# Supplementary material for: Enzymatic cyclizations of squalene analogs with threo- and erythro-diols at the 6,7- or 10,11-positions by recombinant squalene cyclase. Trapping of carbocation intermediates and mechanistic insights into the product and substrate specificities
Source: Royal Society of Chemistry journal article supplement (doi:10.1039/b506590a), 2005-01-01
Supplement: b506590a-2.pdf [file b506590a-2.pdf]

Product **26** (oil) from (10*R*,11*R*)-10,11-DihydroxySQ in  $C_6D_6$

$[\alpha]_D^{25} = -22.9$   
( $c = 0.142$ , in  $CHCl_3$ )

→ Major HMBC  
← Major NOE

COSY: H13-H12, H-12-H11

HRFABMS (glycerol)  
M+H, Found: 445.4113  
Calcd: 445.4046

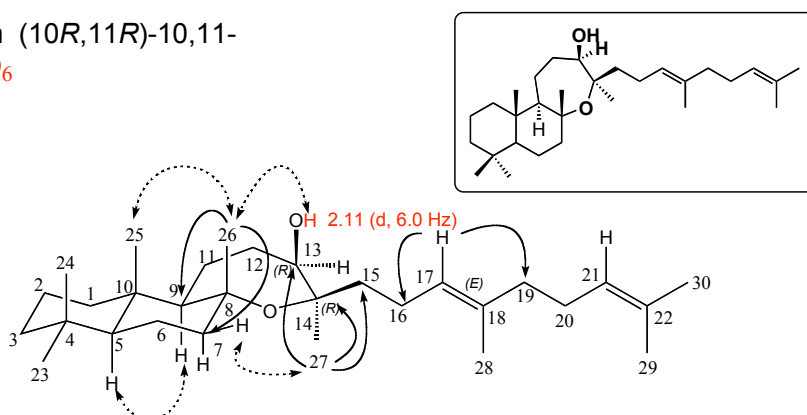

NMR data in  $C_6D_6$ , solvent peak :  $^1H$ ; 7.28 ppm,  $^{13}C$ ; 128.0 ppm

| NO. | $^1H$             | $^{13}C$     | NO. | $^1H$                                 | $^{13}C$     | NO. | $^1H$              | $^{13}C$      | NO. | $^1H$                 | $^{13}C$     |
|-----|-------------------|--------------|-----|---------------------------------------|--------------|-----|--------------------|---------------|-----|-----------------------|--------------|
| 1   | 0.84(m) ; 1.79(m) | <b>40.43</b> | 9   | 1.61(m)                               | <b>59.88</b> | 17  | 5.51 (t, 7.0Hz)    | <b>125.69</b> | 25  | 0.791 (3H,s)          | <b>16.14</b> |
| 2   | 1.47(m); 1.64(m)  | <b>19.11</b> | 10  | —                                     | <b>39.39</b> | 18  | —                  | <b>134.62</b> | 26  | 1.357 (3H,s)          | <b>24.69</b> |
| 3   | 1.21(m); 1.44(m)  | <b>42.25</b> | 11  | 1.51(m) ; 1.74(m)                     | <b>17.39</b> | 19  | 2.26 (2H,t, 6.8Hz) | <b>40.24</b>  | 27  | 1.357 (3H,s)          | <b>24.20</b> |
| 4   | —                 | <b>33.50</b> | 12  | 1.65(m) ; 2.00(m)                     | <b>32.97</b> | 20  | 2.33 (2H,t, 6.8Hz) | <b>27.26</b>  | 28  | 1.845 (3H, s)         | <b>16.16</b> |
| 5   | 0.87(m)           | <b>56.64</b> | 13  | 3.62 (t, 6.0Hz)                       | <b>74.73</b> | 21  | 5.39 (t, 6.8Hz)    | <b>125.01</b> | 29  | 1.704 (3H, s)         | <b>17.75</b> |
| 6   | 1.23(m) ; 1.68(m) | <b>21.48</b> | 14  | —                                     | <b>80.73</b> | 22  | —                  | <b>131.11</b> | 30  | 1.813 (3H, s)         | <b>25.85</b> |
| 7   | 1.72(m) ; 1.98(m) | <b>44.00</b> | 15  | 1.59(m) ; 2.16(dd,13.2, 13.2, 4.8 Hz) | <b>41.71</b> | 23  | 0.958 (3H,s)       | <b>33.55</b>  | OH  | 2.109 (1H, d, 6.0 Hz) |              |
| 8   | —                 | <b>80.44</b> | 16  | 2.31(m) ; 2.41(m)                     | <b>23.21</b> | 24  | 0.866 (3H, s)      | <b>21.50</b>  |     |                       |              |

Product **26** (oil) from (10*R*,11*R*)-10,11-DihydroxySQ in  $acetone-d_6$

→ Major HMBC  
← Major NOE  
COSY: H13/H12, H12/H11

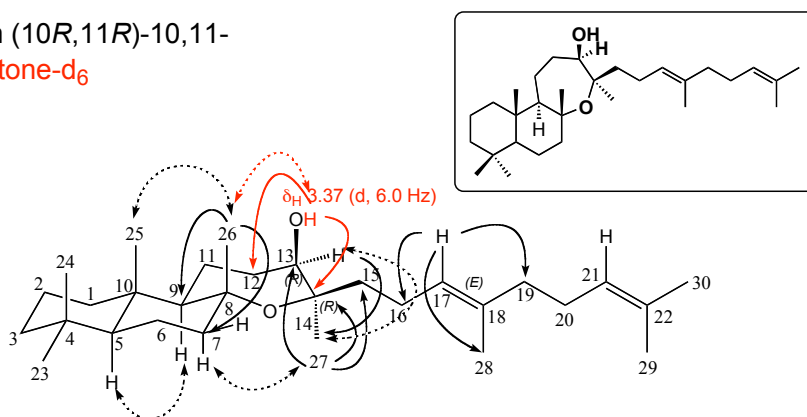

NMR data in  $acetone-d_6$ , solvent peak :  $^1H$ ; 2.04 ppm,  $^{13}C$ ; 29.80 ppm

| NO. | $^1H$                                | $^{13}C$     | NO. | $^1H$              | $^{13}C$     | NO. | $^1H$               | $^{13}C$      | NO. | $^1H$            | $^{13}C$     |
|-----|--------------------------------------|--------------|-----|--------------------|--------------|-----|---------------------|---------------|-----|------------------|--------------|
| 1   | 0.92(m) ; 1.83(m)                    | <b>40.95</b> | 9   | 1.38 (m)           | <b>62.17</b> | 17  | 5.16 (t, 6.8 Hz)    | <b>125.20</b> | 25  | 0.807 (3H,s)     | <b>16.26</b> |
| 2   | 1.42(m) ; 1.65(m)                    | <b>19.50</b> | 10  | —                  | <b>39.49</b> | 18  | —                   | <b>134.59</b> | 26  | 1.336 (3H,s)     | <b>23.53</b> |
| 3   | 1.16(m); 1.35(m)                     | <b>42.68</b> | 11  | 1.47(m); 1.72(m)   | <b>19.11</b> | 19  | 1.96 (2H,t, 6.8Hz)  | <b>40.48</b>  | 27  | 1.202 (3H,s)     | <b>26.99</b> |
| 4   | —                                    | <b>33.97</b> | 12  | 1.69(m) ; 1.85(m)  | <b>32.68</b> | 20  | 2.33 (2H,t, 7.2 Hz) | <b>27.45</b>  | 28  | 1.616 (3H, s)    | <b>16.06</b> |
| 5   | 0.91(m)                              | <b>57.08</b> | 13  | 3.67 (t, 6.0 Hz)   | <b>75.59</b> | 21  | 5.10 (bt, 6.8Hz)    | <b>126.34</b> | 29  | 1.582 (3H, s)    | <b>17.71</b> |
| 6   | 1.27(ddd,12.4,12.4,3.2 Hz) ; 1.62(m) | <b>21.47</b> | 14  | —                  | <b>81.33</b> | 22  | —                   | <b>131.56</b> | 30  | 1.645 (3H, s)    | <b>25.82</b> |
| 7   | 1.57(m) ; 1.77(m)                    | <b>45.30</b> | 15  | 1.35(m) ; 1.83(m)  | <b>40.20</b> | 23  | 0.880 (3H,s)        | <b>33.79</b>  | OH  | 3.37 (d, 6.0 Hz) |              |
| 8   | —                                    | <b>80.28</b> | 16  | 2.02 (m) ; 2.08(m) | <b>23.31</b> | 24  | 0.794 (3H, s)       | <b>21.79</b>  |     |                  |              |

## Product 27

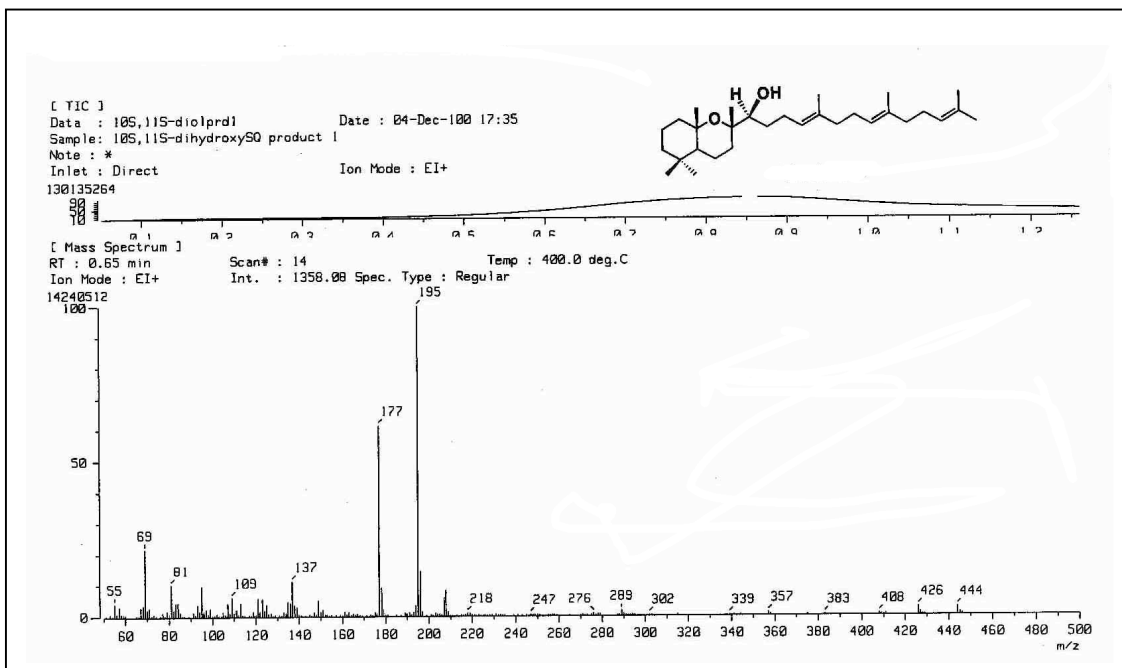

## Product 27 (oil) from (10S,11S)-10,11-DihydroxySQ

$[\alpha]_D^{25} = -9.01$   
 (c 0.233, CHCl<sub>3</sub>)

HRFABMS(glycerol)  
 M+H, Found: 445.4120  
 Calcd: 445.4046

→ Major HMBC  
 ← Major NOE

Selected COSY 45; H10-H11, H11-H12, H12-H13

NMR data in C<sub>6</sub>D<sub>6</sub>, solvent peak : <sup>1</sup>H; 7.28 ppm, <sup>13</sup>C; 128.0 ppm

| NO. | <sup>1</sup> H         | <sup>13</sup> C | NO. | <sup>1</sup> H              | <sup>13</sup> C | NO. | <sup>1</sup> H  | <sup>13</sup> C | NO. | <sup>1</sup> H | <sup>13</sup> C |
|-----|------------------------|-----------------|-----|-----------------------------|-----------------|-----|-----------------|-----------------|-----|----------------|-----------------|
| 1   | 1.34(m) ; 1.71(m)      | 41.92           | 9   | —                           | 75.11           | 17  | 5.42 (t, 6.8Hz) | 124.91          | 25  | 1.274 (3H, s)  | 23.54           |
| 2   | 1.48 (2H,m)            | 20.26           | 10  | 3.43(ddd, 10.4, 5.0, 2.0Hz) | 79.63           | 18  | —               | 134.86          | 26  | 1.255 (3H, s)  | 22.39           |
| 3   | 1.198(m) ; 1.33(m)     | 41.62           | 11  | 1.59(m) ; 1.71(m)           | 31.28           | 19  | 2.21 (2H,m)     | 40.26*          | 27  | 1.826 (3H, s)  | 16.19           |
| 4   | —                      | 33.39           | 12  | 2.49(m) ; 2.69(m)           | 25.62           | 20  | 2.30 (2H,m)     | 27.23**         | 28  | 1.725 (3H, s)  | 16.11           |
| 5   | 1.16 (dd, 12.0, 2.0Hz) | 54.37           | 13  | 5.53 (t, 6.8Hz)             | 125.34          | 21  | 5.37 (t, 7.0Hz) | 124.97          | 29  | 1.690 (3H, s)  | 17.73           |
| 6   | 1.40 (m) ; 1.50(m)     | 16.34           | 14  | —                           | 135.27          | 22  | —               | 131.05          | 30  | 1.806 (3H, s)  | 25.84           |
| 7   | 1.46(m) ; 1.74(m)      | 34.83           | 15  | 2.25 (2H,m)                 | 40.21*          | 23  | 0.910 (3H, s)   | 32.20           |     |                |                 |
| 8   | —                      | 75.73           | 16  | 2.33 (2H,m)                 | 27.11**         | 24  | 0.768 (3H, s)   | 20.87           |     |                |                 |

The signals of C15 and C19 and those of C16 and C19 are interchangeable due to the close values
