# Supplementary material for: Enzymatic cyclizations of squalene analogs with threo- and erythro-diols at the 6,7- or 10,11-positions by recombinant squalene cyclase. Trapping of carbocation intermediates and mechanistic insights into the product and substrate specificities
Source: Royal Society of Chemistry journal article supplement (doi:10.1039/b506590a), 2005-01-01
Supplement: b506590a-5.pdf [file b506590a-5.pdf]

# Product 36

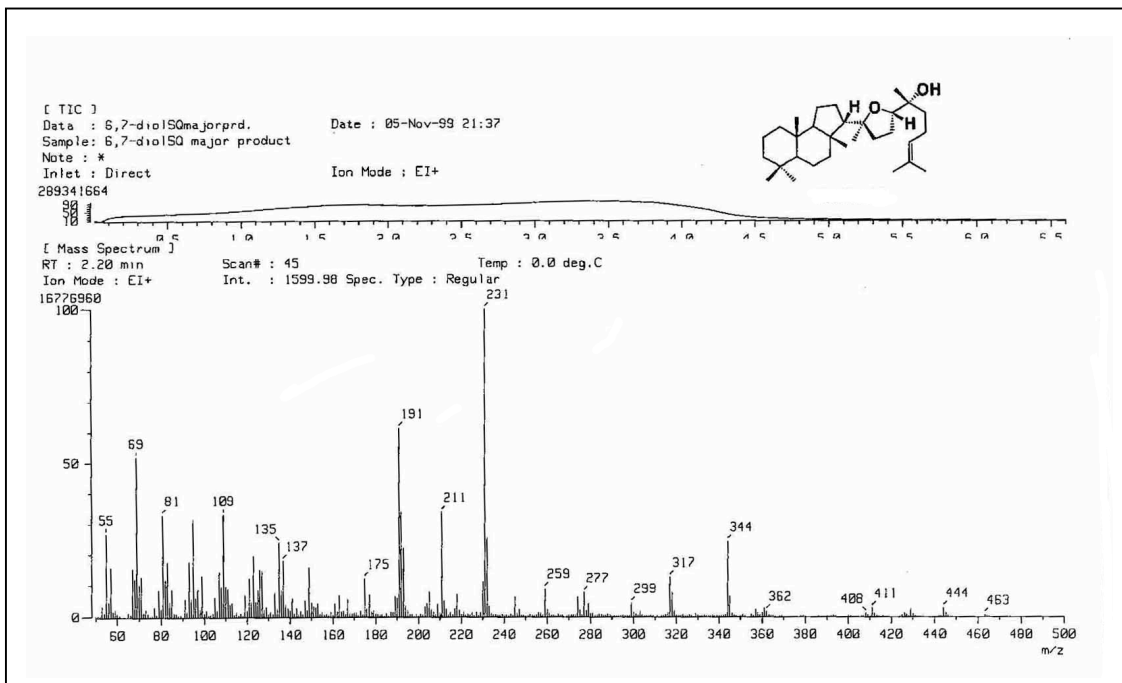

## Product 36 (solid) from (6R, 7S) and (6S, 7R)-SQ diols

$[\alpha]_D^{25} = +29.5^\circ$  (c 0.78, CHCl<sub>3</sub>)

HREIMS:  $m/z$  (M+), calcd. for C<sub>30</sub>H<sub>52</sub>O<sub>2</sub>, 444.3967; found, 444.3974.

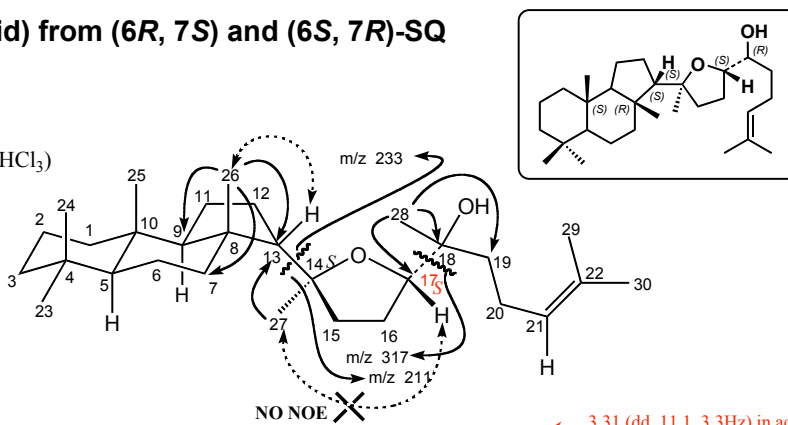

600 MHz

NMR data in C<sub>6</sub>D<sub>6</sub>, solvent peak : <sup>1</sup>H; 7.28 ppm, <sup>13</sup>C; 128.0 ppm

| NO. | <sup>1</sup> H        | <sup>13</sup> C | NO. | <sup>1</sup> H   | <sup>13</sup> C | NO. | <sup>1</sup> H                  | <sup>13</sup> C | NO. | <sup>1</sup> H                               | <sup>13</sup> C |
|-----|-----------------------|-----------------|-----|------------------|-----------------|-----|---------------------------------|-----------------|-----|----------------------------------------------|-----------------|
| 1   | 1.20(m); 1.68(m)      | 41.25           | 9   | 1.68(m)          | 60.28           | 17  | 3.27 (very broad)               | 73.74           | 25  | 1.032 (3H, s)                                | 16.77           |
| 2   | 1.54(m); 1.78(m)      | 19.05           | 10  | —                | 37.46           | 18  | —                               | 76.01           | 26  | 1.100 (3H, s)                                | 27.32           |
| 3   | 1.40(m); 1.56(m)      | 42.79           | 11  | 1.44(m); 1.71(m) | 22.13           | 19  | 1.63; 1.89<br>(dt, 5.3; 12.9Hz) | 43.00           | 27  | 1.371 (bs,<br>decreased signal<br>intensity) | 26.38(#)        |
| 4   | —                     | 33.21           | 12  | 1.73 (2H, m)     | 30.25           | 20  | 2.41(m); 2.54(m)                | 22.35           | 28  | 1.271 (3H, s)                                | 19.66(#)        |
| 5   | 1.17(m)               | 56.97           | 13  | 1.46(m)          | 61.95(#)        | 21  | 5.45 (t, 7.0Hz)                 | 126.21          | 29  | 1.825 (3H, s)                                | 18.11           |
| 6   | 1.59(m); 1.80(m)      | 20.43           | 14  | —                | 76.38           | 22  | —                               | 130.72          | 30  | 1.846 (3H, s)                                | 25.84           |
| 7   | 1.99 (2H, very broad) | 38.94(#)        | 15  | 1.70 (2H, m)     | 34.10(#)        | 23  | 1.066 (3H, s)                   | 33.78           | OH  | 3.83 (brs) in acetone-d <sub>6</sub>         |                 |
| 8   | —                     | 45.26(#)        | 16  | 1.45(m); 1.70(m) | 25.13(#)        | 24  | 1.014 (3H, s)                   | 21.50           |     |                                              |                 |

The blue-colored signals were very small or did not appear.

The assignments of C-11 and C-12 are exchangeable.

**Product 36 (solid) from (6R, 7S) and (6S, 7R)-SQ diols in Acetone-d<sub>6</sub>**

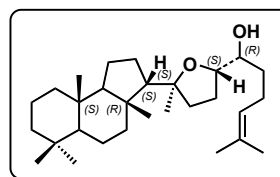

$[\alpha]_D^{25} = +29.5^\circ$  (*c* 0.78, CHCl<sub>3</sub>)

HREIMS: *m/z* (M<sup>+</sup>), calcd. for C<sub>30</sub>H<sub>52</sub>O<sub>2</sub>, 444.3967; found, 444.3974.

→ HMBC  
 ← NOE

600 MHz

NMR data in acetone-d<sub>6</sub>, solvent peak : <sup>1</sup>H; 2.04 ppm, <sup>13</sup>C; 29.80 ppm

| NO. | <sup>1</sup> H    | <sup>13</sup> C | NO. | <sup>1</sup> H    | <sup>13</sup> C | NO. | <sup>1</sup> H         | <sup>13</sup> C | NO. | <sup>1</sup> H               | <sup>13</sup> C |
|-----|-------------------|-----------------|-----|-------------------|-----------------|-----|------------------------|-----------------|-----|------------------------------|-----------------|
| 1   | 0.97(m); 1.47 (m) | 41.53           | 9   | 1.52 (m)          | 60.56           | 17  | 3.31 (dd, 11.1, 3.3Hz) | 73.59           | 25  | 0.832 (3H, s)                | 16.86           |
| 2   | 1.35(m); 1.62 (m) | 19.24           | 10  | —                 | 37.82           | 18  | —                      | 76.72           | 26  | 0.920 (3H, s)                | 27.37           |
| 3   | 1.13(m); 1.33(m)  | 43.09           | 11  | 1.24(m); 1.42(m)  | 22.35#          | 19  | 1.42(m); 1.67(m)       | 43.37           | 27  | 1.324 (s); very small signal | 27.10#          |
| 4   | —                 | 33.53           | 12  | 1.63(m); 1.72 (m) | 26.50#          | 20  | 2.23(m); 2.13 (m)      | 22.56           | 28  | 1.153 (3H, s)                | 20.24           |
| 5   | 0.92 (m)          | 57.29           | 13  | 1.38 (m)          | 62.50#          | 21  | 5.11 (bt, 6.8 Hz)      | 126.7           | 29  | 1.620(3H, s)                 | 18.09           |
| 6   | 1.43 (m); 1.58(m) | 20.25           | 14  | —                 | 76.89           | 22  | —                      | 130.9           | 30  | 1.647 (3H, s)                | 25.81           |
| 7   | 1.79 (2H, m)      | 39.30#          | 15  | 1.70 (2H, m)      | 34.12#          | 23  | 0.823(3H, s)           | 33.84           | OH  | 3.83 (brs)                   |                 |
| 8   | —                 | 45.64#          | 16  | 1.55(m); 1.62(m)  | 25.46#          | 24  | 0.807 (3H, s)          | 21.54           |     |                              |                 |

The blue-colored signals were very small or did not appear. The assignment of C-11 and C-12 is exchangeable.
